# Supplementary material
Source: Royal Society of Chemistry journal article supplement (doi:10.1039/d6cy00076b)

# **From Multifunctional Catalysts to Smart Substrates: Adsorption Control for Efficient Light Driven One-Pot Benzimidazole Synthesis over Pd/NH<sub>2</sub>-Ni-Fe-MOF**

Hurunqing Liu,<sup>a</sup> Lin Ye,<sup>c</sup> Yun Yuan,<sup>a</sup> Quanyuan Wang,<sup>a</sup> Dengrong Sun,<sup>\*bd</sup> Zhaohui Li<sup>\*a</sup>

<sup>a</sup> Research Institute of Photocatalysis, State Key Laboratory of Photocatalysis on Energy and Environment, College of Chemistry, Fuzhou University, Fuzhou 350116, P. R. China.

<sup>b</sup> College of Carbon Neutrality Future Technology, Sichuan University, Chengdu 610065, China.

<sup>c</sup> College of Chemistry, Sichuan University, Chengdu 610065, China.

<sup>d</sup> National Engineering Research Centre for Flue Gas Desulfurization, Sichuan University, Chengdu 610065, China.

\* Corresponding author.

E-mail: dengrongsun@hotmail.com (D. Sun), zhaohuili@fzu.edu.cn (Z. Li)

Fig. S1 FT-IR spectra of NH<sub>2</sub>-Ni-Fe-MOF, Ni-Fe-MOF and Pd<sub>4.0</sub>/NH<sub>2</sub>-Ni-Fe-MOF.

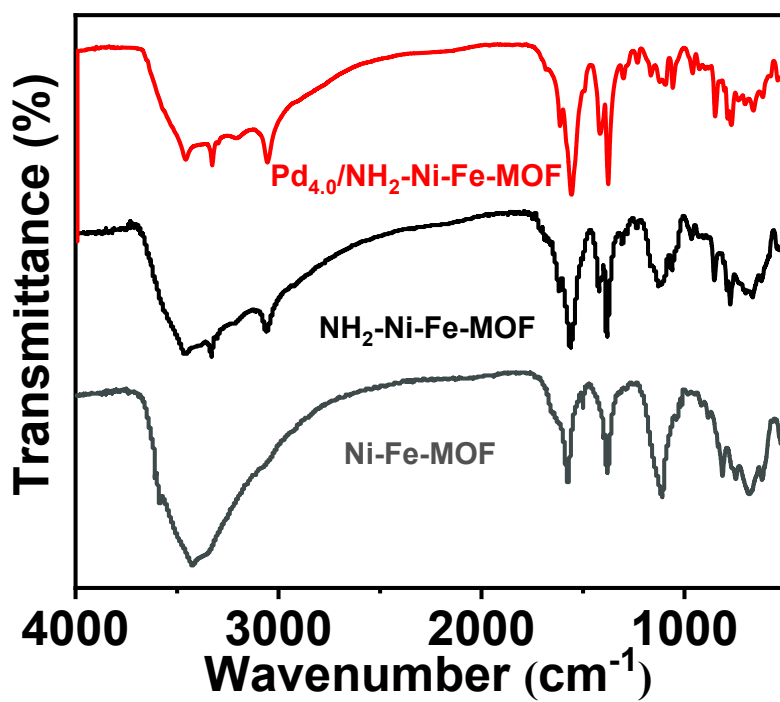

**Fig. S2** Photograph of the reaction suspension performed between *o*-phenylenediamine and benzyl alcohol over Pd<sub>1,0</sub>/NH<sub>2</sub>-Ni-Fe-MOF under visible light irradiation.

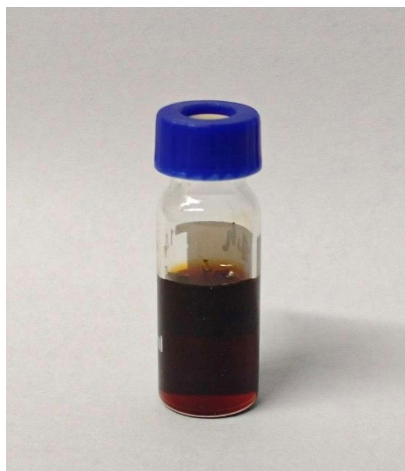

**Fig. S3** The wavelength dependence of the photocatalytic reactions between *o*-nitroaniline and benzyl alcohol to synthesize benzimidazole.

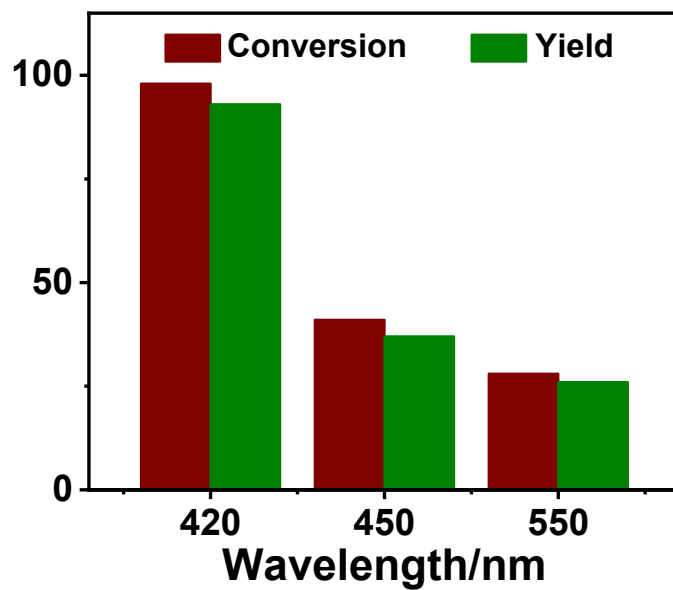

**Fig. S4** (a) XRD patterns of Pd<sub>4.0</sub>/NH<sub>2</sub>-Ni-Fe-MOF before and after the reaction. (b) Cycling of Pd<sub>4.0</sub>/NH<sub>2</sub>-Ni-Fe-MOF for the N-heterocyclic reaction of benzyl alcohol with *o*-nitroaniline

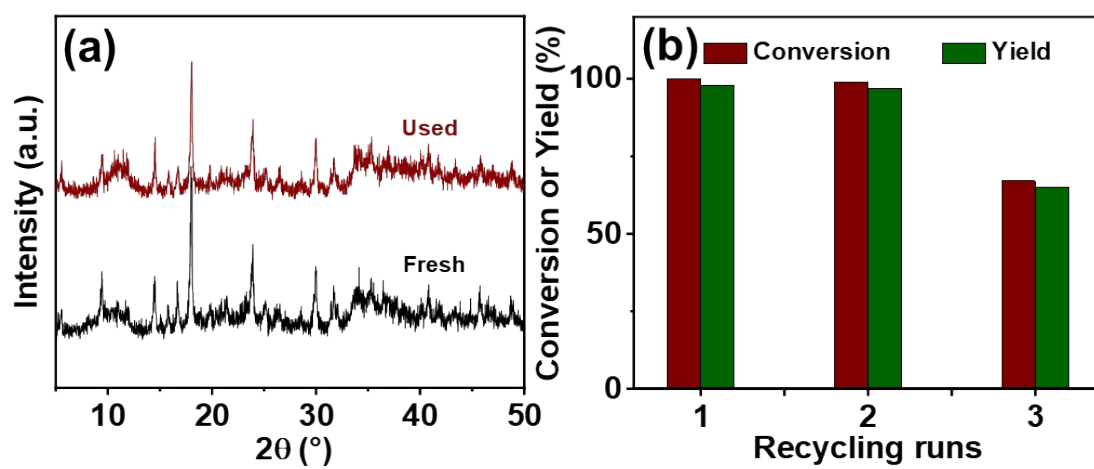

Supplement: d6cy00076b1.pdf [file d6cy00076b1.pdf]
